# Supplementary material for: The sensitivity of EC-Earth3 decadal predictions to the choice of volcanic forcing dataset: Insights for the next major eruption
Source: Copernicus journal article supplement (doi:10.5194/egusphere-2025-609), 2025-03-14
Supplement: Supplementary file [file egusphere-2025-609-AC2-supplement.pdf]

### Referee 1 comments:

I don't see what is new here compared to another paper just published by this group, Bilbao et al. (2024). Is it just by adding one forcing data set, EVA\_H? And since Bilbao et al. (2024) used multiple climate models, why does this paper use only one, and how was it chosen? How model-dependent are the results?

Reply: Bilbao et al. (2024) present a multi-model analysis of the DCPD-C (Boer et al., 2016) decadal predictions, aiming to assess the radiative and dynamical impacts of volcanic eruptions on decadal forecasts, by comparing predictions with/without the official CMIP6 radiative forcings. The objective of this manuscript is different in nature, as it focuses on the uncertainties related to the use of alternative estimations of the volcanic forcings (i.e. from the EVA and EVA\_H tools), which as opposed to the CMIP6 forcings, can be derived relatively quickly from a set of observable parameters that describe their main characteristics. In that sense, this study is more closely linked to the multi-model comparison in Sospedra-Alfonso et al. (2024), within the international initiative VolRes, that uses one of these tools to assess the impacts of a hypothetical eruption in 2022, to demonstrate the capacity of operational decadal prediction centers to rapidly respond to future volcanic eruptions. Our paper fills a gap not previously addressed by VolRes, that is the need to validate the forcings generated by EVA and EVA\_H tools, in a real (and verifiable) climate prediction context. For this we follow a protocol similar to DCPD-C, by repeating the predictions immediately followed by volcanic eruptions, but using three different forcing estimates: CMIP6, EVA and EVA\_H. The decadal predictions are run with EC-Earth3, the climate model developed and used at Barcelona Supercomputing Center.

Regarding the model dependence of the results, Bilbao et al. (2024) showed that the radiative response in the decadal prediction systems analyzed in that study (which used CMIP6 forcing) is largely consistent across models. However, the dynamical responses vary and require large ensembles to be analyzed robustly. Based on these findings, we might expect that predictions using EVA and EVA\_H forcings in other forecast systems would yield similar radiative responses, which is the focus of this manuscript. In the summary and conclusions section we already acknowledge the limitation of analyzing dynamical responses with a small ensemble and encourage other prediction centers to conduct similar experiments to support further progress.

Abstracts should not include references.

Reply: The references have been removed.

The abstract has acronyms that are not defined or explained. What is EVA? What is EVA\_H? How do they differ? What is BSC? What is CMIP6?

Reply: Acronyms have been spelled out.

There are English errors in the abstract. Did the native English speaker authors not edit the paper?

“Despite these differences, comparing the predicted anomalies in those variables with observations, we show that either of the forcings considered allows to make skillful predictions after the major volcanic eruptions.” should be “Despite these differences, comparing the predicted anomalies in those variables with observations, we show that either the EVA or EVA\_H forcing would allow skillful predictions to be made after major volcanic eruptions.”

Reply: The abstract and the manuscript have been proofread.

I think the last two sentences (after English correction) of the abstract are fundamentally wrong: “Despite these differences, comparing the predicted anomalies in those variables with observations, we show that either the EVA or EVA\_H forcing would allow skillful predictions to be made after major volcanic eruptions. Our study thus supports both EVA and EVA\_H generated forcings as reasonable choices for predicting the post-volcanic radiative responses.”

How do you define “skillful?” How do you define “reasonable?” The problems, as discussed below, are that these forcing data sets cannot be created just after an eruption. The location of the eruption and the satellite-observed SO<sub>2</sub> emissions are not enough. Also, the EVA algorithm is too diffusive, and the paper shows that they do not produce the correct latitudinal distribution for the three eruptions studied. And there is no consideration of ENSO and interactions with volcanic eruptions.

Reply: We want to clarify that the location of the eruption and satellite-observed SO<sub>2</sub> emissions are known relatively quickly, thus allowing us to create the EVA/EVA\_H forcings very soon after the eruptions. For example, EVA\_H was run as soon as initial estimates of SO<sub>2</sub> mass were communicated through the Volcano Response (VolRes) mailing list after the Raikoke 2019 eruption, which was 1-2 weeks after the eruption (Vernier et al., 2024). Since then, it's been routinely used to estimate the forcing of other eruptions, usually within 2-15 days of eruption occurrence. The forcing estimates can of course be refined once SO<sub>2</sub> injection source parameters estimates are refined by the remote sensing community, as was done for Raikoke.

We agree that the latitudinal distributions generated by EVA or EVA\_H are simplistic, and that for tropical eruptions transporting aerosol predominantly towards one hemisphere (like Agung 1963 or El Chichón 1982), the predicted latitudinal structure will be too symmetrical. The limitations of these modelling tools are explicitly acknowledged and discussed. However, EVA or EVA\_H are not very different from interactive stratospheric aerosol models from that perspective. For example, several models need to spread the Pinatubo injections all the way to the Equator to produce significant dispersion to the northern hemisphere as observed (e.g. Dhomse et al., 2020).

It is also correct that EVA and EVA\_H do not account for the impact of the background climate state (including ENSO) on the aerosol forcing process. The limitations of these models in terms of process understanding and their empirical nature is simply a trade-off of their negligible computing cost and simplicity of implementation. Users should carefully consider whether using reduced-complexity models (like EVA or EVA\_H) or interactive stratospheric aerosol models is best for their needs. However, given the very large uncertainties in the latter class of models (e.g. Dhomse et al., 2020; Clyne et al., 2021;

Qualia et al., 2023) and the common need for computationally inexpensive approaches (e.g. for rapid response after eruption crisis), reduced-complexity models are valuable tools for numerous applications.

Another important point is that, as far as we know, no other approach to generate more realistic volcanic forcings is suitable for operational prediction purposes, given the short time-constraints to produce them and the fact that both EVA and EVA\_H are flexible enough to produce forcings that meet the requirements of any climate model, as already demonstrated in Sospedra-Alfonso et al. (2024). That justifies even further the need of our study, which allows us to understand what aspects of the volcanic response are still realistically represented in the predictions, despite the problems in reproducing hemispherically asymmetric differences in the aerosol loadings.

And why would you want to use either of these forcings after a large volcanic eruption, when models now exist to quickly simulate the conversion of the observed SO<sub>2</sub> injections into sulfate aerosols, and the transport and radiative forcing from those aerosols? And these can be updated every month incorporating new observations of how the climate and volcanic aerosol cloud are evolving.

Reply: Current decadal prediction systems contributing to the World Meteorological Organization's Lead Centre for Annual-to-Decadal Climate Prediction do not include interactive stratospheric aerosols, and given that such a major upgrade is unlikely to occur any time soon, these systems will continue to rely on prescribed aerosol fields, at least in the near-term. Stratospheric aerosol models could be run offline to produce the forcing which could be used as input for the models. However, results from previous studies show that interactive aerosol models are unlikely to produce results more realistic than EVA or EVA\_H (e.g. Quaglia et al., 2023). These reduced-complexity volcanic forcing models are widely used by the community for numerous applications, including the DCP and VolRes protocol. As explained previously, their strength resides in their simplicity of use and computationally inexpensive approach, and they are limited by their empirical nature and simplicity. We do not argue that these models are better and just like virtually any numerical modelling community, models covering a wide range of complexity co-exist and complement each other. Our paper merely assesses the performance of tools widely used by the community. We also acknowledge the availability of other models and tools that may produce more realistic forcing distributions, but whose suitability for assisting a multi-model operational exercise is still to be demonstrated.

The use of EVA is very problematic, because how is it possible to know the latitudinal extent of the stratospheric cloud a priori? The 1982 El Chichón and 1991 Pinatubo eruptions were only 2.2° different in latitude, but their clouds ended up centered 15° apart, due to the winds on the day of the eruption. How can the hemispheric asymmetry be known ahead of time?

Reply: The hemispheric asymmetry cannot be known ahead of time, and in fact EVA\_H, which does not include this asymmetry, is biased for Agung and El Chichón in terms of latitudinal distribution. In the immediate aftermath of a large tropical eruption, using EVA\_H or EVA (in default configuration) would lead to a hemispherically balanced aerosol distribution, as observed for Pinatubo. Indeed, reality might turn out differently, as has been observed for El Chichón and Agung where the spread was hemispherically biased. The

hemispherical asymmetry factor built into EVA does provide some potentially useful possibilities. For example, predictions could be produced for a range of different asymmetries immediately after the eruption, to produce an uncertainty range due to the unknown hemispheric spread. As observations of the aerosol cloud are collected in the weeks-to-months after the eruption, information about the spread of aerosol may be used to better constrain the asymmetry and thus the associated climate prediction. Used in this way, the EVA tools allow for a quantification of uncertainty in the prediction process. In contrast, an interactive aerosol model could not be used in this way, and show strong inter-model spread with, in some cases, quite significant biases compared to observations in terms of the spread of aerosol between hemispheres (e.g., Quaglia et al, 2023, Fig. 2).

Once again, we do not argue that reduced-complexity models are better. Users should always choose modelling tools according to their needs and be aware of the strengths and weaknesses of the tools they use. Our paper simply helps assess those for the EVA and EVA\_H reduced-complexity volcanic aerosol forcing models.

In fact, Fig. 2 shows that because of the low latitudinal resolution of the EVAs, the observed hemispheric asymmetry of both 1963 Agung and 1982 El Chichón is not reproduced correctly. This is an additional problem.

Reply: This is already highlighted in the paper and is not related to a resolution problem. Full-blown models can be equally wrong for tropical eruption, especially if not nudged, and specifying a hemispheric asymmetry in EVA can simply be seen as the reduced-complexity equivalent of nudging in a more complex model.

Some minor issues:

SO<sub>2</sub> needs to be spelled with the 2 as a subscript.

Reply: Corrected.

Why is the mass of S used in Table S1 and SO<sub>2</sub> in Table S2? This is confusing.

Reply: The input of EVA is the mass of S (in Tg), while for EVA\_H it is the mass of SO<sub>2</sub> (in kt). For the paper we have homogenised the units and are now in kt of SO<sub>2</sub>.

The table headings in Tables S1 and S2 should not have words broken into two lines. This is easy to fix.

Reply: Corrected.

El Chichón is spelled with an accent mark on the o, but this is not consistent in the text or in the figures.

Reply: Corrected.

Why does Fig. 4 not include observations? Why are the observations relegated to a different section?

Reply: As explained in the methods section, we refer to climate response as the difference between the predictions with volcanic forcings (DCPP-A, DCPP-EVA and DCPP-EVA\_H) and without volcanic forcing (DCPP-C). The difference between the predictions is only the volcanic forcing. The climate response cannot be derived from observations as they include both forced and internal variability signals that cannot be separated from each other. That's why they are not included in the figure.

There were El Niños after each of the eruptions studied. This would have a huge impact on the short term seasonal and annual forecasts, especially after El Chichón in 1982, when most of the cooling from the volcanic eruption was offset by the warming from the El Niño. How was this taken into account?

Reply: As well as driven with external radiative forcings (including the volcanic forcing), decadal predictions are initialised from the observed state, which puts the model in phase with observed internal variability. Decadal predictions have been found to be skillful in predicting ENSO out to several months (e.g. Choi and Son, 2022; Bilbao et al., 2021 (for EC-Earth3)).

What do the “syear” labels on each panel in Figs. 4 and 8 mean?

Reply: “sXXX” refers to the startdate, that is, the date in which the decadal prediction is initialised. For example, “s1990” means the prediction has been initialised in 1990, more specifically in November of 1990 for our model. This is a standard nomenclature in the field of decadal prediction. We now explicitly explain it in the figure caption.

“Notably” and “most notably” and “Note that” are used throughout the paper. What do these mean? They should be deleted. Every sentence should be noted or it should not be in the paper.

Reply: Corrected.

Fig. 6: The parts of the maps that are NOT significant should be hatched, rather than the significant parts. Don't cover the results you want the reader to see.

Reply: Both conventions are widely applied in the climate literature. We nonetheless followed the reviewers suggestion and modified figures 6 and 7 as suggested.

Fig. 6: The temperature changes in the panel labels need units. And why do panels f and i only have one digit after the decimal point, while all the other have two?

Reply: Units are in the caption.

There should be a figure added with the Northern Hemisphere winter responses after each eruption for the first winter, too, to see if the model can reproduce the observed winter warming over Eurasia.

Reply: As stated in the introduction and conclusion, this manuscript focuses only on the global radiative response, that has been shown to be less model-dependent. The winter warming over Eurasia is linked to a dynamic response, which we do not cover as they are more sensitive to the model choice and require a larger ensemble size to be detected. We

acknowledge in the text that volcanic eruptions can lead to dynamic responses, as the example noted by the reviewer. We refer the reviewer to lines 360-371.

The Deep-C version 5 dataset is mentioned several times but never explained. What is it?

Reply: See the methods section (lines 114-115).

#### References:

Choi, J., Son, S.W. Seasonal-to-decadal prediction of El Niño–Southern Oscillation and Pacific Decadal Oscillation. *npj Clim Atmos Sci* 5, 29 (2022).

<https://doi.org/10.1038/s41612-022-00251-9>

Clyne, M., Lamarque, J.-F., Mills, M. J., Khodri, M., Ball, W., Bekki, S., Dhomse, S. S., Lebas, N., Mann, G., Marshall, L., Niemeier, U., Poulain, V., Robock, A., Rozanov, E., Schmidt, A., Stenke, A., Sukhodolov, T., Timmreck, C., Toohey, M., Tummon, F., Zanchettin, D., Zhu, Y., and Toon, O. B.: Model physics and chemistry causing intermodel disagreement within the VolMIP-Tambora Interactive Stratospheric Aerosol ensemble, *Atmos. Chem. Phys.*, 21, 3317–3343, <https://doi.org/10.5194/acp-21-3317-2021>, 2021.

Dhomse, S. S., Mann, G. W., Antuña Marrero, J. C., Shallcross, S. E., Chipperfield, M. P., Carslaw, K. S., Marshall, L., Abraham, N. L., and Johnson, C. E.: Evaluating the simulated radiative forcings, aerosol properties, and stratospheric warmings from the 1963 Mt Agung, 1982 El Chichón, and 1991 Mt Pinatubo volcanic aerosol clouds, *Atmos. Chem. Phys.*, 20, 13627–13654, <https://doi.org/10.5194/acp-20-13627-2020>, 2020.

Quaglia, I., Timmreck, C., Niemeier, U., Visioni, D., Pitari, G., Brodowsky, C., Brühl, C., Dhomse, S. S., Franke, H., Laakso, A., Mann, G. W., Rozanov, E., and Sukhodolov, T.: Interactive stratospheric aerosol models' response to different amounts and altitudes of SO<sub>2</sub> injection during the 1991 Pinatubo eruption, *Atmos. Chem. Phys.*, 23, 921–948, <https://doi.org/10.5194/acp-23-921-2023>, 2023.

Sospedra-Alfonso, R., Merryfield, W. J., Toohey, M., Timmreck, C., Vernier, J.-P., Bethke, I., Wang, Y., Bilbao, R., Donat, M. G., Ortega, P., Cole, J., Lee, W.-S., Delworth, T. L., Paynter, D., Zeng, F., Zhang, L., Khodri, M., Mignot, J., Swingedouw, D., Torres, O., Hu, S., Man, W., Zuo, M., Hermanson, L., Smith, D., Kataoka, T., and Tatebe, H.: Decadal prediction centers prepare for a major volcanic eruption, *Bulletin of the American Meteorological Society*, <https://doi.org/10.1175/BAMS-D-23-0111.1>, 2024.
